# Supplementary material for: The guanine nucleotide exchange factor Arhgef5 plays crucial roles in Src-induced podosome formation
Source: Oxford University Press journal article supplement (doi:10.1242/jcs.080291), 2011-04-28
Supplement: jcs080291figs2.pdf [file jcs080291figs2.pdf]

| Fraction | Identified Protein                                                                                          | Accession    |
|----------|-------------------------------------------------------------------------------------------------------------|--------------|
| 1        | similar to HLA-B associated transcript-2 isoform a isoform 1                                                | XP_538834    |
| 2        | similar to HLA-B associated transcript-2 isoform a isoform 1                                                | XP_538834    |
| 2        | similar to rho guanine nucleotide exchange factor 5 isoform 1                                               | XP_539834    |
| 2        | similar to Cell division cycle 2-related protein kinase 7 (CDC2-related protein kinase 7) (CrkRS) isoform 1 | XP_548147    |
| 3        | similar to Ras association and pleckstrin homology domain 1 isoform 2                                       | XP_545607    |
| 4        | Splicing factor 3B subunit 1 (Human)                                                                        |              |
| 5        | similar to splicing factor 3b, subunit 3 isoform 1                                                          | XP_536791    |
| 6        | similar to splicing factor 3 subunit 1                                                                      | XP_534733    |
| 6        | similar to NCK-associated protein 1 isoform 2                                                               | XP_535990    |
| 6        | similar to CBL E3 ubiquitin protein ligase                                                                  | XP_546487    |
| 6        | similar to neutrophil cytosolic factor 1                                                                    | XP_546237    |
| 7        | similar to Dynamin-2 isoform 3                                                                              | XP_867900    |
| 7        | dynamin 1 short form                                                                                        | ACF21009     |
| 8        | similar to procollagen-lysine, 2-oxoglutarate 5-dioxygenase 3 precursor                                     | XP_858413    |
| 9        | similar to cyclin K                                                                                         | XP_855304    |
| 9        | similar to polyadenylate-binding protein 4                                                                  | XP_857000    |
| 10       | similar to cleavage and polyadenylation specific factor 6, 68kD subunit                                     | XP_531671    |
| 10       | similar to polyadenylate-binding protein 1                                                                  | XP_856590    |
| 10       | similar to poly(A) binding protein, cytoplasmic                                                             | XP_534430    |
| 10       | similar to Enabled protein homolog                                                                          | XP_547511    |
| 10       | similar to heat shock protein 8                                                                             | XP_850235    |
| 11       | similar to Wiskott syndrome gene-like protein isoform 1                                                     | XP_532445    |
| 11       | similar to IGF-II mRNA-binding protein 1                                                                    | XP_548184    |
| 12       | similar to heterogeneous nuclear ribonucleoprotein K isoform a isoform 6                                    | XP_856705    |
| 13       | similar to splicing factor 3A subunit 3                                                                     | XP_849980    |
| 14       | similar to WIRE protein                                                                                     | XP_850217    |
| 14       | similar to Tubulin alpha-2 chain                                                                            | XP_850665    |
| 14       | vasodilator-stimulated phosphoprotein (VASP)                                                                | NP_001003256 |
| 14       | similar to tubulin, beta, 2                                                                                 | XP_850498    |
| 15       | vasodilator-stimulated phosphoprotein (VASP)                                                                | NP_001003256 |
| 15       | similar to Elongation factor 1-gamma isoform2                                                               | XP_849510    |
| 16       | similar to heterogeneous nuclear ribonucleoprotein A3 isoform 1                                             | XP_848406    |
| 16       | similar to 40S ribosomal protein SA                                                                         | XP_857587    |
| 17       | similar to suppressor of cytokine signaling 1, protein tyrosine kinase TeclV                                |              |
| 18       | CDC42 binding protein kinase beta (Mouse)                                                                   |              |
| 19       | similar to cytoplasmic beta-actin isoform 1                                                                 | XP_536888    |
| 20       | vasodilator-stimulated phosphoprotein (VASP)                                                                | NP_001003256 |
| 20       | similar to DEAD (Asp-Glu-Ala-Asp) box polypeptide 39 isoform 1                                              | XP_533895    |
| 20       | BCL-like 2 isoform 4                                                                                        | XP_858803    |
| N1       | Keratin                                                                                                     |              |
| N2       | Keratin                                                                                                     |              |
| N3       | similar to bromodomain containing protein 3                                                                 |              |
| N4       | similar to heat shock protein 8 isoform 3                                                                   |              |
| N5       | similar to eukaryotic translation elongation factor 1 alpha 1                                               |              |
| N5       | similar to Elongation factor 1-gamma isoform 2                                                              |              |
| N6       | similar to cytoplasmic beta-actin isoform 9                                                                 |              |
| N6       | similar to Actin, cytoplasmic 1 (Beta-actin 1)                                                              |              |
