# Supplementary material for: The guanine nucleotide exchange factor Arhgef5 plays crucial roles in Src-induced podosome formation
Source: Oxford University Press journal article supplement (doi:10.1242/jcs.080291), 2011-04-28

A

Arhgef5 siRNA + FLAG-Arhgef5 + 4-OHT

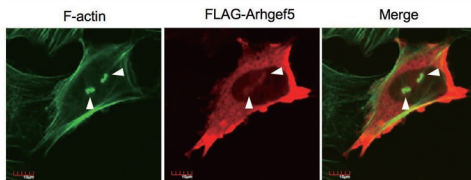

B

NIH3T3-c-*Src*-MER

|                             |     |                                      |
|-----------------------------|-----|--------------------------------------|
| Lysophosphatidic Acid (LPA) | ○ ○ | Sphingosine-1-phosphate (S1P)        |
| Lysophosphocholine (LPC)    | ○ ○ | PtdIns(3,4)P <sub>2</sub> (P-3416)   |
| PtdIns (P-0016)             | ○ ○ | PtdIns(3,5)P <sub>2</sub> (P-3516)   |
| PtdIns(3)P (P-3016)         | ○ ○ | PtdIns(4,5)P <sub>2</sub> (P-4516)   |
| PtdIns(4)P (P-4016)         | ○ ○ | PtdIns(3,4,5)P <sub>3</sub> (P-3916) |
| PtdIns(5)P (P-5016)         | ○ ○ | Phosphatidic Acid PA                 |
| Phosphatidylethanolamine PE | ○ ○ | Phosphatidylserine PS                |
| Phosphatidylcholine PC      | ○ ○ | Blank                                |

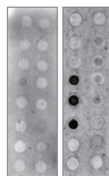GST  
GST-PH

C

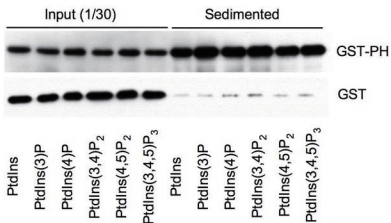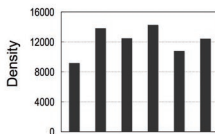

Supplement: jcs080291figs5.pdf [file jcs080291figs5.pdf]
