# Supplementary figures and images for: The guanine nucleotide exchange factor Arhgef5 plays crucial roles in Src-induced podosome formation
Source: Oxford University Press journal article supplement (doi:10.1242/jcs.080291), 2011-04-28

**A**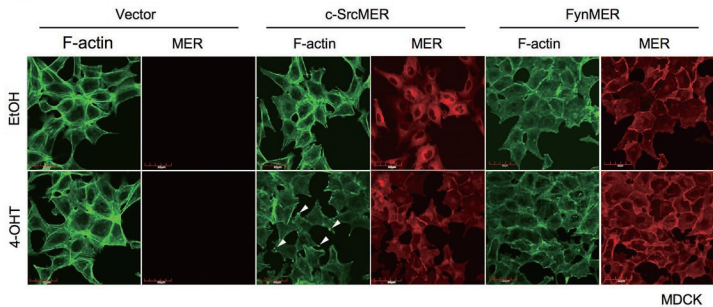**B**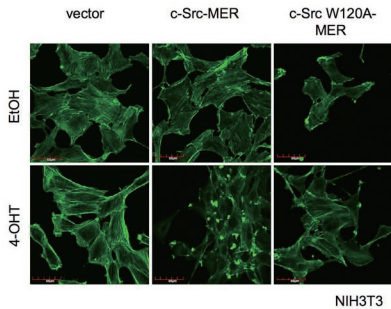**C**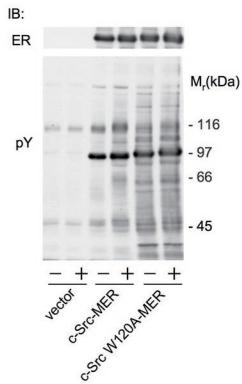

Supplement: jcs080291figs1.pdf [file jcs080291figs1.pdf]

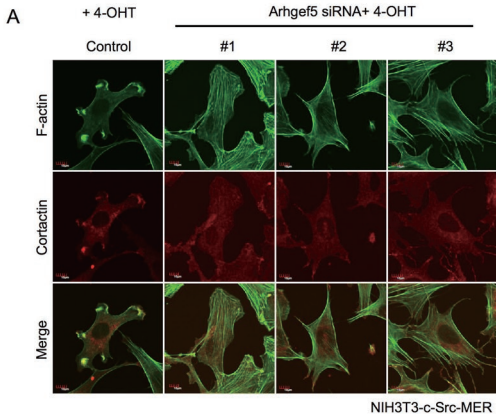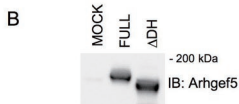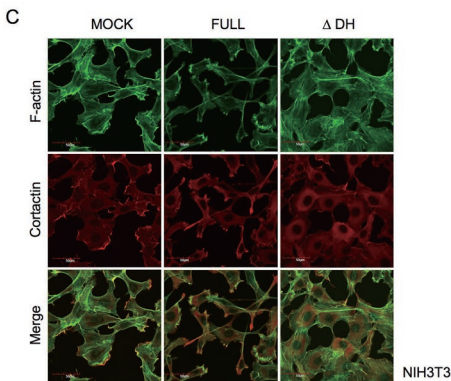

Supplement: jcs080291figs3.pdf [file jcs080291figs3.pdf]

A

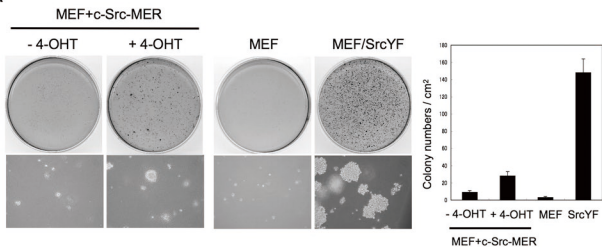

B

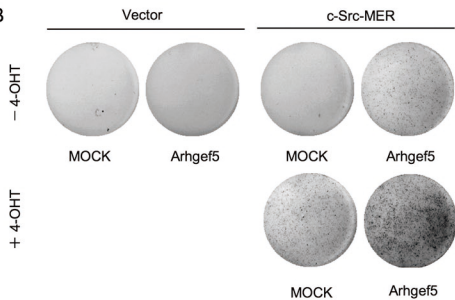

Supplement: jcs080291figs4.pdf [file jcs080291figs4.pdf]

A

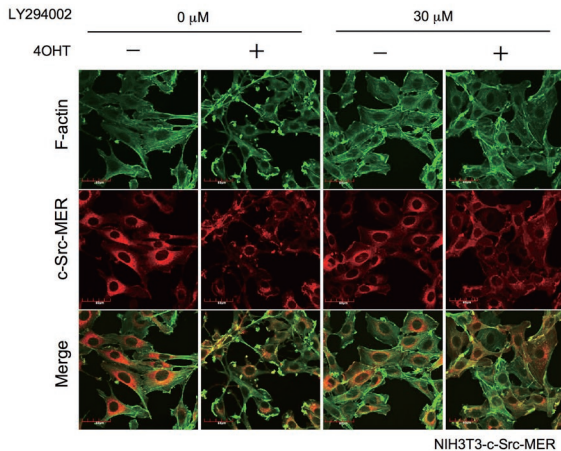

B

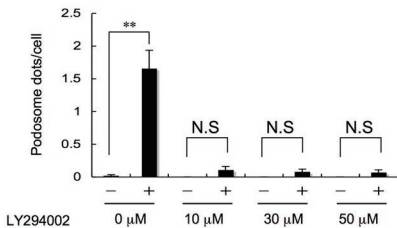

Supplement: jcs080291figs6.pdf [file jcs080291figs6.pdf]

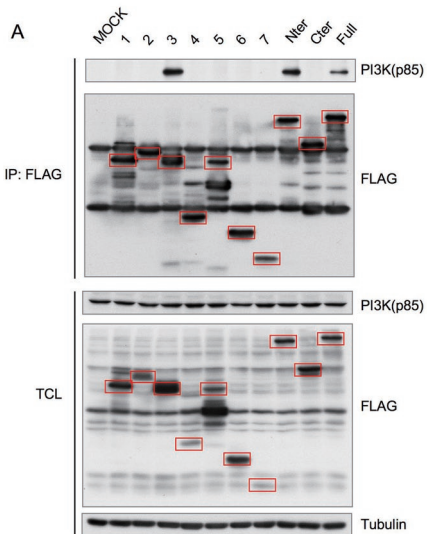

**B**

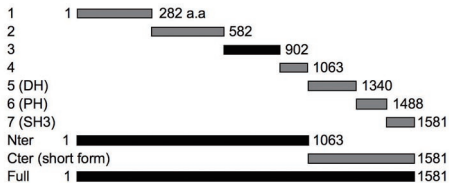

Supplement: jcs080291figs7.pdf [file jcs080291figs7.pdf]

**A**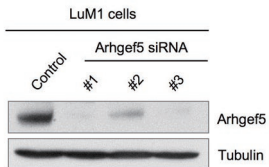**B**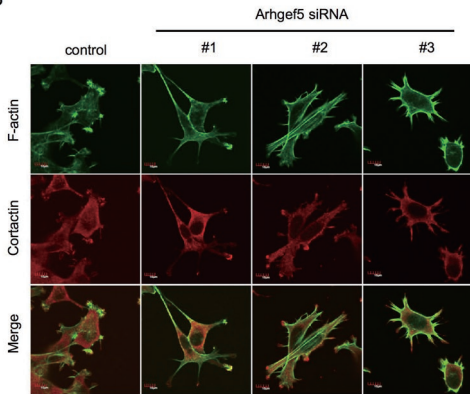

LuM1

Supplement: jcs080291figs8.pdf [file jcs080291figs8.pdf]
